# Supplementary material
Source: Copernicus journal article supplement (doi:10.5194/egusphere-2026-2433)
Supplement: Supplementary file 1 [file egusphere-2026-2433-supplement.pdf]

**Supplemental for The Calibrated Rapid Assimilation and Forecasting Technique (CRAFT) for Earth system and ecological modeling using machine learning and Bayesian estimation**

**Geoscientific model development**

**Zachary J. Robbins, Lucas Tiede, Charlie Koven, Ryan Knox, Nate McDowell, Chonggang Xu.**

|                                                                                                                                                                                |           |
|--------------------------------------------------------------------------------------------------------------------------------------------------------------------------------|-----------|
| <b>Table S1: The FATES-HYDRO parameters tested from Xu et al., 2022.....</b>                                                                                                   | <b>2</b>  |
| <b>Table S2: All Shapley importance values from FATES-HYDRO variables for FATES GPP outputs.....</b>                                                                           | <b>4</b>  |
| <b>Table S3: All Shapley importance values from FATES-HYDRO variables for QRUNOFF outputs.....</b>                                                                             | <b>5</b>  |
| <b>Table S4: All Shapley importance values from FATES-HYDRO variables for H2OSOI1 outputs.....</b>                                                                             | <b>6</b>  |
| <b>Table S5: All Shapley importance values from FATES-HYDRO variables for minimum Leaf water potential outputs.....</b>                                                        | <b>7</b>  |
| <b>Table S6: All Shapley importance values from FATES-HYDRO variables for evapotranspiration potential outputs.....</b>                                                        | <b>9</b>  |
| <b>Table S7: Comparison of the derivative relationship for change in input and out variables of FATES, and an emulator for all variables selected for the wet season .....</b> | <b>11</b> |
| <b>Table S8: Comparison of the derivative relationship for change in input and out variables of FATES, and an emulator for all variables selected for the dry season.....</b>  | <b>13</b> |

**Table S1: The FATES-HYDRO parameters tested from Xu et al., 2022. Not that Organ=All denote four tissues being parameterized (Leaf, Stem, Transfer Roots, Absorbing Roots), Organ=Whole Tree denotes a single parameter, and other combination is the number of organs listed.**

| Parameter (abbreviation)                                           | Organ          | Unit                                                 | Range                                                            |
|--------------------------------------------------------------------|----------------|------------------------------------------------------|------------------------------------------------------------------|
| Saturated Water Content                                            | All            | cm <sup>3</sup> cm <sup>-3</sup>                     | Leaf: Beta (9.69, 6.20)<br>Stem, TRoot, ARoot Beta (22.98, 5.29) |
| Osmotic potential at full turgor                                   | All            | MPa                                                  | Leaf: G [9.8,6.26], Stem, TRoot, ARoot: LN [0.32,0.39]           |
| Bulk elastic modulus                                               | All            | MPa                                                  | Leaf: G (4.07, 4.12)<br>Stem, TRoot and ARoot: G [3.57, 3.84]    |
| Residual water fraction                                            | All            | unitless                                             | Leaf: B [2.14,4.10]<br>Stem, TRoot and ARoot: B [2.71, 4.53]     |
| Fraction of water in capillary reserve                             | All            | unitless                                             | U [0.1, 0.7]                                                     |
| Water potential at 50% loss of conductivity                        | Stem and Roots | MPa                                                  | Stem, TRoot and ARoot: G [2.07, 1.18]                            |
| Vulnerability curve shape                                          | Stem and Roots | unitless                                             | Stem, TRoot and ARoot: LN [0.82, 0.66].                          |
| Xylem conductivity per unit sapwood area                           | Whole plant    | kg m <sup>-1</sup> s <sup>-1</sup> MPa <sup>-1</sup> | G [1.41,2.37]                                                    |
| Xylem taper exponent for sapwood                                   | Whole plant    | unitless                                             | U (0.08, 0.5)                                                    |
| Leaf area to sapwood area ratio                                    | Whole plant    | unitless                                             | LN (-0.48, 0.77)                                                 |
| specific root length                                               | Whole plant    | m g <sup>-1</sup>                                    | G [1.70,35.31]                                                   |
| absorbing root radius                                              | Whole plant    | mm                                                   | LN [1.91,0.79]                                                   |
| fraction of total tree resistance that is aboveground (rfrac_stem) | Whole plant    | Unitless                                             | U [0.1,0.7]                                                      |
| root-soil interface conductivity per unit surface area (Kr1)       | Whole plant    | kg m <sup>-1</sup> s <sup>-1</sup> MPa <sup>-1</sup> | G [1.41,2.37]                                                    |
| maximum root water loss rate (Kr2)                                 | Whole plant    | kg m <sup>-1</sup> s <sup>-1</sup> MPa <sup>-1</sup> | LN [-6.80, 0.92]                                                 |
| Specific leaf area at top of canopy (SLA)                          | Whole plant    | m <sup>2</sup> gC <sup>-1</sup>                      | U [0.003-0.046]                                                  |

|                                                                    |             |                                                      |             |
|--------------------------------------------------------------------|-------------|------------------------------------------------------|-------------|
| maximum carboxylation rate of Rub. at 25C,<br>canopy top (Vcmax25) | Whole plant | $\mu\text{mol CO}_2$<br>$\text{m}^{-2}\text{s}^{-1}$ | U [30,100]  |
| mean density of woody tissue in plant<br>(wood_density)            | Whole plant | $\text{g cm}^{-3}$                                   | U [0.2,0.8] |
| stomatal slope parameter, as per Ball-Berry<br>(ball_berry_slope)  | Whole plant | unitless                                             | U [4,16]    |

---

**Table S2:** All Shapley importance values from FATES-HYDRO variables for FATES GPP outputs

| FATES Hydro Parameter | Shapley Importance Value |
|-----------------------|--------------------------|
| sla_top               | 0.434526                 |
| Vcmax25               | 0.299593                 |
| ball_berry_slope      | 0.110143                 |
| month                 | 0.023381                 |
| p_taper               | 0.023181                 |
| p50_gs                | 0.01836                  |
| kmax_node_stem        | 0.01596                  |
| year                  | 0.010746                 |
| rootpara_b            | 0.005681                 |
| latosa                | 0.004968                 |
| p50_node_stem         | 0.003127                 |
| thetas_node_aroot     | 0.002472                 |
| epsil_node_stem       | 0.002451                 |
| rs2                   | 0.002414                 |
| srl                   | 0.002369                 |
| bbopt_c3              | 0.002351                 |
| pitlp_node_leaf       | 0.002144                 |
| pitlp_node_aroot      | 0.002104                 |
| rsurf2                | 0.002071                 |
| rsurf1                | 0.002044                 |
| p50_node_troot        | 0.001902                 |
| epsil_node_aroot      | 0.001837                 |
| resid_node_leaf       | 0.001825                 |
| avuln_node_stem       | 0.001691                 |
| avuln_node_troot      | 0.001526                 |
| rfrac_stem            | 0.001523                 |
| resid_node_stem       | 0.001492                 |
| resid_node_troot      | 0.001445                 |
| epsil_node_leaf       | 0.001443                 |
| thetas_node_troot     | 0.001414                 |
| resid_node_aroot      | 0.001282                 |
| thetas_node_stem      | 0.001214                 |
| fcap_node_stem        | 0.001171                 |
| pitlp_node_troot      | 0.001135                 |
| thetas_node_leaf      | 0.001132                 |
| avuln_node_aroot      | 0.001092                 |
| pitlp_node_stem       | 0.001051                 |
| rootshoot             | 0.001043                 |
| wood_den              | 0.00094                  |
| p50_node_aroot        | 0.000889                 |
| fcap_node_troot       | 0.000783                 |
| rootpara_a            | 0.000782                 |
| epsil_node_troot      | 0.000689                 |
| hf_flg_threshold      | 0.000613                 |

**Table S3:** All Shapley importance values from FATES-HYDRO variables for QRUNOFF outputs

| FATES Hydro Parameter | Shapley Importance Value |
|-----------------------|--------------------------|
| month                 | 0.469669                 |
| year                  | 0.312945                 |
| p_taper               | 0.081732                 |
| kmax_node_stem        | 0.025466                 |
| latosa                | 0.016723                 |
| rfrac_stem            | 0.016288                 |
| sla_top               | 0.01174                  |
| rs2                   | 0.011399                 |
| ball_berry_slope      | 0.006156                 |
| srl                   | 0.004753                 |
| rootshoot             | 0.003068                 |
| Vcmax25               | 0.002774                 |
| rootpara_a            | 0.001497                 |
| pitlp_node_leaf       | 0.001315                 |
| bbopt_c3              | 0.001259                 |
| thetas_node_aroot     | 0.001256                 |
| thetas_node_stem      | 0.001247                 |
| wood_den              | 0.001236                 |
| fcap_node_troot       | 0.001232                 |
| hf_flg_threshold      | 0.001196                 |
| resid_node_troot      | 0.001193                 |
| epsil_node_aroot      | 0.001181                 |
| resid_node_stem       | 0.001174                 |
| fcap_node_stem        | 0.001166                 |
| avuln_node_aroot      | 0.00116                  |
| avuln_node_stem       | 0.001159                 |
| pitlp_node_stem       | 0.001153                 |
| avuln_node_troot      | 0.001148                 |
| p50_node_aroot        | 0.00114                  |
| pitlp_node_aroot      | 0.001138                 |
| rsurf1                | 0.001135                 |
| epsil_node_stem       | 0.001132                 |
| p50_node_stem         | 0.001124                 |
| rsurf2                | 0.001121                 |
| thetas_node_leaf      | 0.001121                 |
| resid_node_aroot      | 0.001118                 |
| p50_gs                | 0.00111                  |
| resid_node_leaf       | 0.001109                 |
| rootpara_b            | 0.001108                 |
| p50_node_troot        | 0.001101                 |
| pitlp_node_troot      | 0.00108                  |
| epsil_node_leaf       | 0.001079                 |
| thetas_node_troot     | 0.001056                 |
| epsil_node_troot      | 0.001043                 |

**Table S4:** All Shapley importance values from FATES-HYDRO variables for H2OSOI1 outputs

| FATES Hydro Parameter | Shapley Importance Value |
|-----------------------|--------------------------|
| month                 | 0.629393                 |
| year                  | 0.124244                 |
| sla_top               | 0.107962                 |
| p_taper               | 0.043007                 |
| kmax_node_stem        | 0.01805                  |
| latosa                | 0.014695                 |
| rfrac_stem            | 0.012816                 |
| rs2                   | 0.006271                 |
| srl                   | 0.003294                 |
| ball_berry_slope      | 0.002075                 |
| rootshoot             | 0.001897                 |
| Vcmax25               | 0.001824                 |
| resid_node_stem       | 0.001386                 |
| pitlp_node_troot      | 0.001378                 |
| thetas_node_troot     | 0.001315                 |
| wood_den              | 0.001277                 |
| rsurf1                | 0.001273                 |
| pitlp_node_aroot      | 0.001269                 |
| thetas_node_aroot     | 0.001207                 |
| epsil_node_aroot      | 0.001155                 |
| p50_node_aroot        | 0.001135                 |
| fcap_node_troot       | 0.001129                 |
| p50_gs                | 0.001112                 |
| resid_node_troot      | 0.001112                 |
| hf_flg_threshold      | 0.00111                  |
| p50_node_stem         | 0.0011                   |
| avuln_node_aroot      | 0.001096                 |
| thetas_node_stem      | 0.001087                 |
| pitlp_node_stem       | 0.001071                 |
| fcap_node_stem        | 0.00105                  |
| resid_node_aroot      | 0.001032                 |
| avuln_node_stem       | 0.001019                 |
| epsil_node_stem       | 0.000993                 |
| thetas_node_leaf      | 0.000991                 |
| bbopt_c3              | 0.000959                 |
| avuln_node_troot      | 0.000959                 |
| epsil_node_leaf       | 0.000951                 |
| p50_node_troot        | 0.000943                 |
| rootpara_b            | 0.000939                 |
| rootpara_a            | 0.000922                 |
| rsurf2                | 0.000904                 |
| resid_node_leaf       | 0.000887                 |
| pitlp_node_leaf       | 0.000868                 |
| epsil_node_troot      | 0.000842                 |

**Table S5:** All Shapley importance values from FATES-HYDRO variables for minimum Leaf water potential outputs

| FATES Hydro Parameter | Shapley Importance Value |
|-----------------------|--------------------------|
| p50_node_aroot        | 0.22339                  |
| rs2                   | 0.116195                 |
| p_taper               | 0.106388                 |
| latosa                | 0.04018                  |
| ball_berry_slope      | 0.044518                 |
| kmax_node_stem        | 0.03638                  |
| srl                   | 0.035862                 |
| rfrac_stem            | 0.035598                 |
| rootshoot             | 0.034182                 |
| bbopt_c3              | 0.032491                 |
| rootpara_b            | 0.024127                 |
| epsil_node_stem       | 0.021028                 |
| p50_gs                | 0.018077                 |
| Vcmax25               | 0.014486                 |
| epsil_node_leaf       | 0.012171                 |
| avuln_node_troot      | 0.012003                 |
| hf_flg_threshold      | 0.010228                 |
| pitlp_node_troot      | 0.009912                 |
| resid_node_stem       | 0.009548                 |
| thetas_node_troot     | 0.009415                 |
| fcap_node_stem        | 0.009292                 |
| fcap_node_troot       | 0.00865                  |
| Year                  | 0.007823                 |
| epsil_node_troot      | 0.007607                 |
| avuln_node_stem       | 0.007301                 |
| wood_den              | 0.007291                 |
| thetas_node_stem      | 0.007035                 |

|                   |          |
|-------------------|----------|
| avuln_node_aroot  | 0.00691  |
| rsurf2            | 0.006693 |
| resid_node_troot  | 0.006564 |
| p50_node_aroot    | 0.006551 |
| resid_node_leaf   | 0.006396 |
| p50_node_stem     | 0.005806 |
| DOY               | 0.00579  |
| pitlp_node_leaf   | 0.005694 |
| rsurf1            | 0.005643 |
| rootpara_a        | 0.005626 |
| pitlp_node_aroot  | 0.00508  |
| resid_node_aroot  | 0.004869 |
| sla_top           | 0.003606 |
| pitlp_node_stem   | 0.003549 |
| thetas_node_leaf  | 0.00348  |
| thetas_node_aroot | 0.003397 |
| epsil_node_aroot  | 0.00317  |

**Table S6:** All Shapley importance values from FATES-HYDRO variables for evapotranspiration potential outputs.

| FATES Hydro Parameter | Shapley Importance Value |
|-----------------------|--------------------------|
| ball_berry_slope      | 0.400983                 |
| month                 | 0.311402                 |
| Vcmax25               | 0.078631                 |
| year                  | 0.065808                 |
| sla_top               | 0.052088                 |
| p_taper               | 0.01383                  |
| p50_gs                | 0.011702                 |
| bbopt_c3              | 0.011176                 |
| kmax_node_stem        | 0.007943                 |
| latosa                | 0.003436                 |
| p50_node_troot        | 0.003296                 |
| rs2                   | 0.002629                 |
| wood_den              | 0.002088                 |
| p50_node_stem         | 0.001868                 |
| rfrac_stem            | 0.001767                 |
| pitlp_node_leaf       | 0.001657                 |
| rootpara_b            | 0.001592                 |
| resid_node_aroot      | 0.00141                  |
| fcap_node_troot       | 0.00137                  |
| thetas_node_stem      | 0.001347                 |
| rootshoot             | 0.001282                 |
| epsil_node_stem       | 0.001234                 |
| resid_node_leaf       | 0.001225                 |
| p50_node_aroot        | 0.001217                 |
| hf_flg_threshold      | 0.001137                 |
| fcap_node_stem        | 0.001129                 |

|                   |          |
|-------------------|----------|
| thetas_node_leaf  | 0.001113 |
| avuln_node_stem   | 0.001093 |
| pitlp_node_stem   | 0.001058 |
| epsil_node_aroot  | 0.001053 |
| rootpara_a        | 0.001023 |
| srl               | 0.00101  |
| rsurf1            | 0.000955 |
| pitlp_node_troot  | 0.000939 |
| resid_node_stem   | 0.000909 |
| avuln_node_aroot  | 0.000889 |
| rsurf2            | 0.000881 |
| avuln_node_troot  | 0.00088  |
| pitlp_node_aroot  | 0.000866 |
| thetas_node_aroot | 0.000866 |
| thetas_node_troot | 0.00083  |
| epsil_node_troot  | 0.00082  |
| epsil_node_leaf   | 0.000812 |
| resid_node_troot  | 0.000755 |

**Table S7:** Comparison of the derivative relationship for change in input and out variables of FATES, and an emulator for all variables selected for the wet season

| Output Variable       | Input Variable   | p-value     | Significance |
|-----------------------|------------------|-------------|--------------|
| Wet Season GPP        | p_taper          | 1           | NA           |
| Wet Season GPP        | ball berry slope | 1           | NA           |
| Wet Season GPP        | Vcmax25          | 1           | NA           |
| Wet Season GPP        | sla_top          | 1           | NA           |
| Wet Season GPP        | P50_node_Aroot   | 1           | NA           |
| Wet Season GPP        | rs2              | 1           | NA           |
| Wet Season GPP        | year             | 0.82        | NA           |
| Wet Season GPP        | month            | 1           | NA           |
| Wet Season ET         | p_taper          | 1           | NA           |
| Wet Season ET         | ball berry slope | 1           | NA           |
| Wet Season ET         | Vcmax25          | 1           | NA           |
| Wet Season ET         | sla_top          | 1           | NA           |
| Wet Season ET         | P50_node_Aroot   | 1           | NA           |
| Wet Season ET         | rs2              | 0.91        | NA           |
| Wet Season ET         | year             | 0.97        | NA           |
| Wet Season ET         | month            | 1           | NA           |
| Wet Season RO         | p_taper          | 1           | NA           |
| Wet Season RO         | ball berry slope | 0.37        | NA           |
| Wet Season RO         | Vcmax25          | 1           | NA           |
| Wet Season RO         | sla_top          | 1           | NA           |
| Wet Season RO         | P50_node_Aroot   | 0.16        | NA           |
| Wet Season RO         | rs2              | 0.99        | NA           |
| Wet Season RO         | year             | 1           | NA           |
| Wet Season RO         | month            | 1           | NA           |
| Wet Season H2O Soil 1 | p_taper          | 1           | NA           |
| Wet Season H2O Soil 1 | ball berry slope | <b>0.05</b> | <0.05        |
| Wet Season H2O Soil 1 | Vcmax25          | 0.97        | NA           |
| Wet Season H2O Soil 1 | sla_top          | 1.0         | NA           |
| Wet Season H2O Soil 1 | P50_node_Aroot   | 0.15        | NA           |
| Wet Season H2O Soil 1 | rs2              | 0.58        | NA           |
| Wet Season H2O Soil 1 | year             | 0.47        | NA           |
| Wet Season H2O Soil 1 | month            | 1           | NA           |
| Wet Season LWP_max    | p_taper          | 1           | NA           |
| Wet Season LWP_max    | ball berry slope | 1           | NA           |
| Wet Season LWP_max    | Vcmax25          | 1           | NA           |
| Wet Season LWP_max    | sla_top          | 0.04        | <0.05        |
| Wet Season LWP_max    | P50_node_Aroot   | 1           | NA           |
| Wet Season LWP_max    | rs2              | 1           | NA           |
| Wet Season LWP_max    | year             | 1           | NA           |

|                    |                  |      |    |
|--------------------|------------------|------|----|
| Wet Season LWP_max | month            | 1    | NA |
| Wet Season LWP_min | p_taper          | 1    | NA |
| Wet Season LWP_min | ball berry slope | 0.82 | NA |
| Wet Season LWP_min | Vcmax25          | 1    | NA |
| Wet Season LWP_min | sla_top          | 1    | NA |
| Wet Season LWP_min | P50_node_Aroot   | 0.21 | NA |
| Wet Season LWP_min | rs2              | 1    | NA |
| Wet Season LWP_min | year             | 0.08 | NA |
| Wet Season LWP_min | month            | 1    | NA |

---

**Table S8:** Comparison of the derivative relationship for change in input and out variables of FATES, and an emulator for all variables selected for the dry season

| Output Var            | Input Variable   | p-value     | Significance |
|-----------------------|------------------|-------------|--------------|
| Dry Season GPP        | p_taper          | 1           | NA           |
| Dry Season GPP        | ball berry slope | 1           | NA           |
| Dry Season GPP        | Vcmax25          | 1           | NA           |
| Dry Season GPP        | sla_top          | 1           | NA           |
| Dry Season GPP        | P50_node_Aroot   | 1           | NA           |
| Dry Season GPP        | rs2              | 1           | NA           |
| Dry Season GPP        | year             | 0.58        | NA           |
| Dry Season GPP        | month            | 1           | NA           |
| Dry Season ET         | p_taper          | 1           | NA           |
| Dry Season ET         | ball berry slope | 1           | NA           |
| Dry Season ET         | Vcmax25          | 1           | NA           |
| Dry Season ET         | sla_top          | 1           | NA           |
| Dry Season ET         | P50_node_Aroot   | 1           | NA           |
| Dry Season ET         | rs2              | 0.70        | NA           |
| Dry Season ET         | year             | 0.02        | < 0.05       |
| Dry Season ET         | month            | 1           | NA           |
| Dry Season RO         | p_taper          | 1           | NA           |
| Dry Season RO         | ball berry slope | 0.58        | NA           |
| Dry Season RO         | Vcmax25          | 0.99        | NA           |
| Dry Season RO         | sla_top          | 1.0         | NA           |
| Dry Season RO         | P50_node_Aroot   | <b>0.02</b> | < 0.05       |
| Dry Season RO         | rs2              | 1           | NA           |
| Dry Season RO         | year             | 1           | NA           |
| Dry Season RO         | month            | 1           | NA           |
| Dry Season H20 Soil 1 | p_taper          | 1           | NA           |
| Dry Season H20 Soil 1 | ball berry slope | 0.99        | NA           |
| Dry Season H20 Soil 1 | Vcmax25          | 0.10        | NA           |
| Dry Season H20 Soil 1 | sla_top          | 1.0         | NA           |
| Dry Season H20 Soil 1 | P50_node_Aroot   | 0.58        | NA           |
| Dry Season H20 Soil 1 | rs2              | <b>0.01</b> | <0.05        |
| Dry Season H20 Soil 1 | year             | 0.99        | NA           |
| Dry Season H20 Soil 1 | month            | 0.99        | NA           |
| Dry Season LWP_max    | p_taper          | 1           | NA           |
| Dry Season LWP_max    | ball berry slope | 1           | NA           |
| Dry Season LWP_max    | Vcmax25          | 1           | NA           |
| Dry Season LWP_max    | sla_top          | 1           | NA           |
| Dry Season LWP_max    | P50_node_Aroot   | 1           | NA           |
| Dry Season LWP_max    | rs2              | 1           | NA           |
| Dry Season LWP_max    | year             | 1           | NA           |
| Dry Season LWP_max    | month            | 1           | NA           |
| Dry Season LWP_min    | p_taper          | 1           | NA           |

|                    |                  |      |    |
|--------------------|------------------|------|----|
| Dry Season LWP_min | ball berry slope | 1    | NA |
| Dry Season LWP_min | Vcmax25          | 1    | NA |
| Dry Season LWP_min | sla_top          | 1    | NA |
| Dry Season LWP_min | P50_node_Aroot   | 0.82 | NA |
| Dry Season LWP_min | rs2              | 1    | NA |
| Dry Season LWP_min | year             | 1    | NA |
| Dry Season LWP_min | month            | 0.91 | NA |
